# Supplementary material
Source: PubMed Central journal article supplement (PMC9121303)
Supplement: jamaoncol-e221059-s00.pdf [file jamaoncol-e221059-s00.pdf]

## Data Sharing Statement

Blohmer. Effect of Denosumab Added to 2 Different nab-Paclitaxel Regimens as Neoadjuvant Therapy in Patients With Primary Breast Cancer. *JAMA Oncol.* Published May 19, 2022.  
doi:10.1001/jamaoncol.2022.1059

### Data

**Data available:** Yes

**Data types:** Deidentified participant data, Other (please specify)

**Additional Information:** individual participant data that underlie the results reported in this article, after final analysis and publication of all secondary efficacy endpoints

**How to access data:** Proposals should be directed to

<http://www.gbg.de/de/forschung/translazionale-forschung.php>; to gain access, data requestors will need to sign a data transfer agreement

**When available:** With publication

### Supporting Documents

**Document types:** None

### Additional Information

**Who can access the data:** Proposals should be directed to

<http://www.gbg.de/de/forschung/translazionale-forschung.php>; to gain access, data requestors will need to sign a data transfer agreement

**Types of analyses:** scientific research

**Mechanisms of data availability:** Proposals should be directed to

<http://www.gbg.de/de/forschung/translazionale-forschung.php>; to gain access, data requestors will need to sign a data transfer agreement

**Any additional restrictions:** after final analysis and publication of all secondary efficacy endpoints
