# Supplementary material
Source: PubMed Central journal article supplement (PMC9121303)
Supplement: jamaoncol-e221059-s003.pdf [file jamaoncol-e221059-s003.pdf]

## Supplemental Online Content

Blohmer J-U, Link T, Reinisch M, et al; GBG and AGO-B. Effect of denosumab added to 2 different nab-paclitaxel regimens as neoadjuvant therapy in patients with primary breast cancer: the GeparX 2 × 2 randomized clinical trial. *JAMA Oncol*. Published online May 19, 2022. doi:10.1001/jamaoncol.2022.1059

### **eAppendix.**

**eTable 1.** Patient and tumor baseline characteristics (ITT population)

**eTable 2.** Tumor baseline stratification parameters in 4 groups as randomized (ITT population)

**eTable 3.** Multivariable logistic regression analysis adjusted for primary endpoint pCR (ypT0 ypN0)

**eTable 4.** Comparison of short-term efficacy according to different pCR endpoints

**eTable 5.** Adherence to treatment

**eTable 6.** Hematological and non-hematological adverse events

**eFigure 1.** Patient-reported outcomes denosumab

**eFigure 2.** Patient-reported outcomes nab-paclitaxel

This supplemental material has been provided by the authors to give readers additional information about their work.

## eAppendix

### Patient selection and study design

Further main eligibility criteria included normal cardiac function by ECG and cardiac ultrasound (left ventricular ejection fraction or shortening fraction) within 3 months prior to randomization, in case of HER2-positive disease with left ventricular ejection fraction >55%, no known or suspected cardiac disease, negative serum pregnancy test within 14 days prior to randomization for all women of childbearing potential with the result available before dosing, no history of significant neurological or psychiatric disorders, no pre-existing motor or sensory neuropathy of  $\geq$ grade 2 by National Cancer Institute Common Terminology Criteria for Adverse Events Version 4.0 (NCI-CTCAE v4.0) criteria, no prior chemotherapy for any malignancy or radiation therapy for breast cancer, and no concurrent treatment with chronic corticosteroids, sex hormones or other experimental drugs or anticancer-therapy. Patients were excluded if they had inadequate general condition, previous malignant disease being disease-free for less than 5 years (except carcinoma in situ [CIS] of the cervix and non-melanomatous skin cancer), pure lobular carcinomas (lobular histology and G1/G2 and HR+/HER2-), stages cT1a, cT1b, or any M1, a history of disease with influence on bone metabolism (such as osteoporosis, Paget's disease of bone, primary hyperparathyroidism requiring treatment at the time of randomization or considered likely to become necessary within the subsequent six months), bisphosphonates or denosumab use within the past year, significant dental/oral disease, including prior history or current evidence of osteonecrosis/osteomyelitis of the jaw, active dental or jaw condition which requires oral surgery, non-healed dental/oral surgery, planned invasive dental procedure for the course of the study, last visit to a dentist > 1/2 year ago, currently active infection, incomplete wound healing, definite contraindications for the use of corticosteroids, known hypersensitivity reaction to one of the compounds or incorporated substances used in GeparX (inclusive calcium and vitamin D) or known hereditary fructose intolerance.

Laboratory requirements included absolute neutrophil count  $\geq 2.0 \times 10^9/l$ , platelets  $\geq 100 \times 10^9/l$  and hemoglobin  $\geq 10$  g/dl ( $\geq 6.2$  mmol/l); total bilirubin  $\leq 1.5$ x upper normal limit (UNL); ASAT (SGOT) and ALAT (SGPT)  $\leq 1.5$ x UNL; and alkaline phosphatase  $\leq 2.5$ x UNL.; serum calcium or albumin-adjusted serum calcium  $\geq 2.0$  mmol/L (8.0 mg/dL) and  $\leq 2.9$  mmol/L (11.5 mg/dL). Hypocalcaemia had to be corrected before study entry by supplementation of calcium and vitamin D.

Both randomizations were performed by dynamic allocation using the Pocock and Simon minimization method [1]. Complete baseline documentation was entered by study sites in the web-based electronic documentation system. After entering complete baseline data in the randomization database, patient number and treatment arm were assigned by the system and communicated to the participating site. Participants and investigators were not blinded. The stratification factors for randomization were defined as follows:

LPBC (negative defined as  $\leq 50\%$  stromal tumor infiltrating lymphocytes vs present defined as  $> 50\%$  stromal tumor infiltrating lymphocytes), breast cancer subtype (HER2-negative, hormone-receptor-positive vs triple-negative breast cancer vs HER2-positive), epirubicin/cyclophosphamide treatment (every two weeks vs every 3 weeks), and denosumab treatment (yes vs no) for the second randomization.

### Study assessments

Pathological response was assessed considering all removed breast and lymphatic tissues from all surgeries. Patients with histologically positive nodes prior to treatment start and no axilla surgery after chemotherapy were counted as no pCR. Patients with negative sentinel node biopsy prior to treatment start and no axillary surgery after chemotherapy were counted as pCR, if they had no residual tumor detected in the removed breast tissue. Patients with positive sentinel node biopsy prior to treatment start and no residual tumor detected in the removed breast tissue and lymph nodes after chemotherapy were counted as pCR (preferably axillary dissection instead of sentinel node biopsy was strongly recommended in this situation). Patients with no axillary surgery at all were counted as no pCR. Patients who had not received breast surgery counted as no pCR. All local histopathological reports were centrally evaluated by an independent pathologist blinded to treatment and not otherwise involved in the trial.

Toxicity reported as adverse events (AE) was based on NCI-CTCAE v4.0. AEs of special interest (AESIs) included hypocalcemia grade  $\geq 3$ , osteonecrosis of the jaw, and atypical fractures of the femur for patients on denosumab, any adverse event affecting cranial nerves, anaphylaxis, and macular edema for patients on nab-paclitaxel, and cardiac failure, infusion reaction, pulmonary toxicity, hypersensitivity, and infections and infestations for patients treated with trastuzumab (ABP 980).

Patient-reported outcomes were assessed at baseline (BL), after nab-paclitaxel, at end of treatment and 90 days post-surgery using the Functional Assessment of Cancer Therapy-Taxane (FACT-Taxane) questionnaire, FACT-Taxane Trial Outcome Index (TOI), FACT-G total score, and FACT-Taxane total score scales. Higher mean scores indicate better functioning and quality of life (QoL).

### Statistical analysis

Computation for sample size calculations was performed with nQuery Advisor 6.02. The sample size calculation was based on the following assumptions: An improvement of the pCR rate by denosumab in all patients was from 35% to 46% (OR=1.58) and an improvement of the pCR rate by different schedules of chemotherapy (nab-paclitaxel 125mg day 1,8 q22 (Cb) followed by EC arm to nab-paclitaxel 125mg weekly (Cb) followed by EC) from 36% to 45% (OR=1.45). With 778 recruited patients, the primary  $\chi^2$ -test of pCR rates between denosumab and no denosumab arms had 92% power to the 2-sided significance level  $\alpha=0.10$ . The  $\chi^2$ -test of pCR rates between nab-paclitaxel 125mg weekly (Cb) followed by EC to nab-paclitaxel 125mg day 1,8 q22 (Cb) followed by EC arms had 80% power to the 2-sided significance level  $\alpha=0.10$ . Co-primary objectives were tested according to the improved Bonferroni procedure: the smaller of the two p-values was compared with  $\alpha = 0.1$  and the larger p-value was compared with  $\alpha = 0.2$  to keep the overall significance level of the study of  $\alpha = 0.2$ .

The primary endpoint was also analyzed in subgroups defined by the stratification factors LPBC (no vs yes), breast cancer subtype (HER2-/HR+ vs TNBC vs HER2+), EC (every 2 vs every 3 weeks), and denosumab arm (for nab-paclitaxel comparison). The Breslow-Day test was used to test for interaction between treatment arm and binary subgroup variables, and the Wald p-value from the logistic regression including treatment arm, subtype and their interaction was used for interaction with the breast cancer subtype. There was no adjustment for the multiple comparisons in the analyses for the stratified subgroups.

Multivariable logistic regression analysis including both randomizations adjusting for stratification factors and the predefined covariates age (<40 vs  $\geq$ 40 years), tumor size ( $\leq$ 25 vs >25 mm), tumor stage (cT1-3 vs cT4), nodal status (cN0 vs cN+), and grade (1-2 vs 3); additionally, a multivariable logistic regression including interaction between denosumab and chemotherapy arms was performed.

For quality of life analyses, mixed models including BL value as a random effect and treatment, time, and treatment by time interaction as fixed effects were used to compare the quality of life scores.

All statistical analyses were performed using SAS® Version 9.4 with SAS Enterprise Guide Version 7.1 on Microsoft Windows 7 Enterprise.

## Supplementary References

---

<sup>1</sup> Pocock SJ, Simon R. Sequential treatment assignment with balancing for prognostic factors in the controlled clinical trial. *Biometrics* 1975; 31: 103-115.

**eTable 1: Patient and tumor baseline characteristics (ITT population)**

| Parameter                  | 1 <sup>st</sup> randomization |                                 | 2 <sup>nd</sup> randomization |                                       |
|----------------------------|-------------------------------|---------------------------------|-------------------------------|---------------------------------------|
|                            | Dmab<br>N=390<br>N (valid %)  | no Dmab<br>N=390<br>N (valid %) | nP wk<br>N=390<br>N (valid %) | nP d1,8 q3 wk<br>N=390<br>N (valid %) |
| Gender                     |                               |                                 |                               |                                       |
| female                     | 389 (99.7)                    | 390 (100)                       | 389 (99.7)                    | 390 (100)                             |
| male                       | 1 (0.3)                       | 0 (0.0)                         | 1 (0.3)                       | 0 (0.0)                               |
| Age (years)                |                               |                                 |                               |                                       |
| Median                     | 49.0                          | 48.5                            | 49.0                          | 49.0                                  |
| Range                      | 23.0, 78.0                    | 22.0, 80.0                      | 23.0, 78.0                    | 22.0, 80.0                            |
| BMI (kg/m <sup>2</sup> )   |                               |                                 |                               |                                       |
| Median                     | 24.6                          | 24.9                            | 24.5                          | 25.1                                  |
| Range                      | 17.6, 53.4                    | 18.1, 54.4                      | 17.6, 54.4                    | 17.8, 53.4                            |
| Menopausal status          |                               |                                 |                               |                                       |
| pre- and perimenopausal    | 218 (55.9)                    | 235 (60.3)                      | 229 (58.7)                    | 224 (57.4)                            |
| postmenopausal             | 171 (43.8)                    | 155 (39.7)                      | 160 (41.0)                    | 166 (42.6)                            |
| n.a. (male patient)        | 1 (0.3)                       | 0 (0.0)                         | 1 (0.3)                       | 0 (0.0)                               |
| Tumor focality, sonography |                               |                                 |                               |                                       |
| Unifocal                   | 323 (82.8)                    | 324 (83.1)                      | 323 (82.8)                    | 324 (83.1)                            |
| Multifocal                 | 47 (12.1)                     | 46 (11.8)                       | 50 (12.8)                     | 43 (11.0)                             |
| Multicentric               | 20 (5.1)                      | 20 (5.1)                        | 17 (4.4)                      | 23 (5.9)                              |
| Tumor stage, sonography    |                               |                                 |                               |                                       |
| cT1                        | 135 (35.0)                    | 156 (40.4)                      | 132 (34.4)                    | 159 (41.0)                            |
| cT2                        | 222 (57.5)                    | 213 (55.2)                      | 230 (59.9)                    | 205 (52.8)                            |
| cT3                        | 18 (4.7)                      | 11 (2.8)                        | 13 (3.4)                      | 16 (4.1)                              |
| cT4                        | 11 (2.8)                      | 6 (1.6)                         | 9 (2.3)                       | 8 (2.1)                               |

|                                                       |            |            |            |            |
|-------------------------------------------------------|------------|------------|------------|------------|
| missing                                               | 4          | 4          | 6          | 2          |
| Nodal stage, sonography                               |            |            |            |            |
| cN0                                                   | 232 (59.9) | 233 (60.2) | 238 (61.0) | 227 (59.1) |
| cN1                                                   | 134 (34.6) | 136 (35.1) | 131 (33.6) | 139 (36.2) |
| cN2                                                   | 18 (4.7)   | 12 (3.1)   | 16 (4.1)   | 14 (3.6)   |
| cN3                                                   | 3 (0.8)    | 6 (1.6)    | 5 (1.3)    | 4 (1.0)    |
| missing                                               | 3          | 3          | 0          | 6          |
| Core- or fine needle biopsy of lymph node             |            |            |            |            |
| none                                                  | 272 (69.7) | 299 (76.7) | 284 (72.8) | 287 (73.6) |
| negative                                              | 27 (6.9)   | 18 (4.6)   | 23 (5.9)   | 22 (5.6)   |
| positive                                              | 91 (23.3)  | 73 (18.7)  | 83 (21.3)  | 81 (20.8)  |
| cN combined*                                          |            |            |            |            |
| cN0                                                   | 242 (62.2) | 239 (61.3) | 246 (63.1) | 235 (60.4) |
| cN+                                                   | 147 (37.8) | 151 (38.7) | 144 (36.9) | 154 (39.6) |
| missing                                               | 1          | 0          | 0          | 1          |
| Sentinel node biopsy (not recommended)                |            |            |            |            |
| none                                                  | 326 (83.6) | 323 (82.8) | 329 (84.4) | 320 (82.1) |
| negative                                              | 45 (11.5)  | 46 (11.8)  | 45 (11.5)  | 46 (11.8)  |
| positive                                              | 19 (4.9)   | 21 (5.4)   | 16 (4.1)   | 24 (6.2)   |
| no sentinel detected                                  | 0 (0.0)    | 0 (0.0)    | 0 (0.0)    | 0 (0.0)    |
| Tumor grading                                         |            |            |            |            |
| G1                                                    | 7 (1.8)    | 7 (1.8)    | 7 (1.8)    | 7 (1.8)    |
| G2                                                    | 128 (32.8) | 119 (30.5) | 126 (32.3) | 121 (31.0) |
| G3                                                    | 255 (65.4) | 264 (67.7) | 257 (65.9) | 262 (67.2) |
| Histological tumor type                               |            |            |            |            |
| Invasive carcinoma NST                                | 374 (95.9) | 375 (96.2) | 380 (97.4) | 369 (94.6) |
| Invasive lobular carcinoma or mixed lobular carcinoma | 6 (1.5)    | 9 (2.3)    | 5 (1.3)    | 10 (2.6)   |
| other                                                 | 10 (2.6)   | 6 (1.5)    | 5 (1.3)    | 11 (2.8)   |
| ER/PgR, central                                       |            |            |            |            |
| both ER and PgR negative                              | 185 (47.4) | 180 (46.2) | 177 (45.4) | 188 (48.2) |

|                                      |            |            |            |            |
|--------------------------------------|------------|------------|------------|------------|
| ER and/or PgR positive               | 205 (52.6) | 210 (53.8) | 213 (54.6) | 202 (51.8) |
| HER2, central                        |            |            |            |            |
| negative                             | 313 (80.3) | 314 (80.5) | 314 (80.5) | 313 (80.3) |
| positive                             | 77 (19.7)  | 76 (19.5)  | 76 (19.5)  | 77 (19.7)  |
| Subtype (stratification)             |            |            |            |            |
| HER2-/HR+                            | 153 (39.2) | 157 (40.3) | 155 (39.7) | 155 (39.7) |
| TNBC                                 | 160 (41.0) | 157 (40.3) | 159 (40.8) | 158 (40.5) |
| HER2+                                | 77 (19.7)  | 76 (19.5)  | 76 (19.5)  | 77 (19.7)  |
| Ki-67, central (stratification)      |            |            |            |            |
| ≤20%                                 | 73 (18.7)  | 59 (15.1)  | 63 (16.2)  | 69 (17.7)  |
| >20%                                 | 317 (81.3) | 331 (84.9) | 327 (83.8) | 321 (82.3) |
| LPBC, central (stratification)       |            |            |            |            |
| no LPBC (≤50% sTILs)                 | 359 (92.1) | 359 (92.1) | 359 (92.1) | 359 (92.1) |
| LPBC (>50% sTILs)                    | 31 (7.9)   | 31 (7.9)   | 31 (7.9)   | 31 (7.9)   |
| Planned EC schedule (stratification) |            |            |            |            |
| 2-weekly                             | 206 (52.8) | 208 (53.3) | 207 (53.1) | 207 (53.1) |
| 3-weekly                             | 184 (47.2) | 182 (46.7) | 183 (46.9) | 183 (46.9) |
| Germline BRCA                        |            |            |            |            |
| wildtype                             | 94 (24.1)  | 87 (22.3)  | 92 (23.6)  | 89 (22.8)  |
| mutant                               | 28 (7.2)   | 32 (8.2)   | 30 (7.7)   | 30 (7.7)   |
| unknown                              | 268 (68.7) | 271 (69.5) | 268 (68.7) | 271 (69.5) |

\*combination of palpation, sonography and core- or fine needle biopsy;

BMI = Body mass index; EC = epirubicin, cyclophosphamide; ER = estrogen receptor; HER2 = human epidermal growth factor receptor 2; HR = hormone receptor; ITT = intent-to-treat; LPBC = lymphocyte-predominant breast cancer; NST = no special type; PgR = progesterone receptor; sTILs = stromal tumor-infiltrating lymphocytes; TNBC = triple-negative breast cancer; wk = weekly; d1,8 q3 wk = days 1 and 8 every-3-weeks

**eTable 2: Tumor baseline stratification parameters in 4 groups as randomized (ITT population)**

| Parameter                | Parameter value | nP wk with Dmab | nP wk without Dmab | nP d1,8 q3 wk with Dmab | nP d1,8 q3 wk without Dmab |
|--------------------------|-----------------|-----------------|--------------------|-------------------------|----------------------------|
| Breast cancer subtype    | HER2-/HR+       | 63 (32.3)       | 92 (47.2)          | 90 (46.2)               | 65 (33.3)                  |
|                          | TNBC            | 89 (45.6)       | 70 (35.9)          | 71 (36.4)               | 87 (44.6)                  |
|                          | HER2+           | 43 (22.1)       | 33 (16.9)          | 34 (17.4)               | 43 (22.1)                  |
|                          | missing         | 0               | 0                  | 0                       | 0                          |
| Ki-67, central pathology | <=20%           | 36 (18.5)       | 27 (13.8)          | 37 (19.0)               | 32 (16.4)                  |
|                          | >20%            | 159 (81.5)      | 168 (86.2)         | 158 (81.0)              | 163 (83.6)                 |
|                          | missing         | 0               | 0                  | 0                       | 0                          |
| LPBC, central pathology  | no LPBC         | 179 (91.8)      | 180 (92.3)         | 180 (92.3)              | 179 (91.8)                 |
|                          | LPBC            | 16 (8.2)        | 15 (7.7)           | 15 (7.7)                | 16 (8.2)                   |
|                          | missing         | 0               | 0                  | 0                       | 0                          |
| Planned EC schedule      | 2-weekly        | 102 (52.3)      | 105 (53.8)         | 104 (53.3)              | 103 (52.8)                 |
|                          | 3-weekly        | 93 (47.7)       | 90 (46.2)          | 91 (46.7)               | 92 (47.2)                  |
|                          | missing         | 0               | 0                  | 0                       | 0                          |

Dmab = denosumab; EC = epirubicin, cyclophosphamide; HER2 = human epidermal growth factor receptor 2; HR = hormone receptor; ITT = intent-to-treat; LPBC = lymphocyte-predominant breast cancer; nP = nab-Paclitaxel; TNBC = triple-negative breast cancer; wk = weekly; d1,8 q3 wk = days 1 and 8 every-3-weeks



**eTable 3: Multivariable logistic regression analysis adjusted for primary endpoint pCR (ypT0 ypN0)**

| Parameter                    | Category      | OR    | 90% CI         | 95% CI         | p-value |
|------------------------------|---------------|-------|----------------|----------------|---------|
| <b>Arm denosumab</b>         | no Dmab       |       |                |                |         |
|                              | Dmab          | 0.922 | (0.707, 1.202) | (0.672, 1.265) | 0.61    |
| <b>Arm nab-paclitaxel</b>    | nP d1,8 q3 wk |       |                |                |         |
|                              | nP wk         | 1.361 | (1.043, 1.776) | (0.992, 1.869) | 0.06    |
| <b>Breast cancer subtype</b> | HER2-/HR+     |       |                |                | <0.001  |
|                              | TNBC          | 3.526 | (2.586, 4.808) | (2.437, 5.102) | <0.001  |
|                              | HER2+         | 4.692 | (3.227, 6.821) | (3.004, 7.327) | <0.001  |
| <b>LPBC</b>                  | no            |       |                |                |         |
|                              | yes           | 2.477 | (1.489, 4.123) | (1.350, 4.545) | 0.003   |
| <b>EC schedule</b>           | 2-wk          |       |                |                |         |
|                              | 3-wk          | 1.004 | (0.767, 1.314) | (0.728, 1.383) | 0.98    |
| <b>Age, years</b>            | <40           |       |                |                |         |
|                              | >=40          | 0.855 | (0.611, 1.198) | (0.572, 1.277) | 0.44    |
| <b>Tumor size, mm</b>        | ≤25           |       |                |                |         |
|                              | >25           | 0.571 | (0.433, 0.753) | (0.410, 0.794) | 0.001   |
| <b>cT</b>                    | cT1-3         |       |                |                |         |
|                              | cT4           | 0.586 | (0.205, 1.674) | (0.168, 2.046) | 0.40    |
| <b>cN</b>                    | cN0           |       |                |                |         |
|                              | cN+           | 0.892 | (0.669, 1.189) | (0.633, 1.256) | 0.51    |
| <b>Grading</b>               | G1-2          |       |                |                |         |
|                              | G3            | 2.531 | (1.863, 3.441) | (1.756, 3.649) | <0.001  |

770 of 780 patients had no missing values and were included in the multivariable analysis.

CI = confidence interval; Dmab = denosumab; EC = epirubicin, cyclophosphamide; HER2 = human epidermal growth factor receptor 2; HR = hormone receptor; LPBC = lymphocyte predominant breast cancer; nP = nab-paclitaxel; OR = odds ratio; pCR = pathological complete response; TNBC = triple-negative breast cancer; wk = weekly; d1,8 q3 wk = days 1 and 8 every-3-weeks; q2 wk = every-2-weeks

**eTable 4: Comparison of short-term efficacy according to different pCR endpoints**

| pCR#                   | Dmab<br>N(%)      | no Dmab<br>N(%)   | p-value<br>Dmab<br>stratified* | nP wk<br>N(%)     | nP d1,8 q3 wk<br>N(%) | p-value<br>nP<br>stratified** | Overall<br>N(%) |
|------------------------|-------------------|-------------------|--------------------------------|-------------------|-----------------------|-------------------------------|-----------------|
| <b>ypT0/is, ypN0</b>   |                   |                   |                                |                   |                       |                               |                 |
| yes                    | 179 (45.9)        | 189 (48.5)        | 0.44                           | 197 (50.5)        | 171 (43.8)            | 0.04                          | 368 (47.2)      |
| 90% CI                 | (41.7%,<br>50.0%) | (44.3%,<br>52.6%) |                                | (46.3%,<br>54.7%) | (39.7%,<br>48.0%)     |                               |                 |
| <b>ypT0, ypN0/+</b>    |                   |                   |                                |                   |                       |                               |                 |
| yes                    | 166 (42.6)        | 181 (46.4)        | 0.22                           | 185 (47.4)        | 162 (41.5)            | 0.06                          | 347 (44.5)      |
| 90% CI                 | (38.4%,<br>46.7%) | (42.3%,<br>50.6%) |                                | (43.3%,<br>51.6%) | (37.4%,<br>45.6%)     |                               |                 |
| <b>ypT0/is, ypN0/+</b> |                   |                   |                                |                   |                       |                               |                 |
| yes                    | 190 (48.7)        | 208 (53.3)        | 0.15                           | 214 (54.9)        | 184 (47.2)            | 0.02                          | 398 (51.0)      |
| 90% CI                 | (44.6%,<br>52.9%) | (49.2%,<br>57.5%) |                                | (50.7%,<br>59.0%) | (43.0%,<br>51.3%)     |                               |                 |
| <b>ypT(any), ypN0</b>  |                   |                   |                                |                   |                       |                               |                 |
| yes                    | 291 (74.6)        | 297 (76.2)        | 0.59                           | 302 (77.4)        | 286 (73.3)            | 0.26                          | 588 (75.4)      |
| 90% CI                 | (71.0%,<br>78.2%) | (72.6%,<br>79.7%) |                                | (74.0%,<br>80.9%) | (69.7%,<br>77.0%)     |                               |                 |

CI = confidence interval; Dmab = denosumab; EC = epirubicin, cyclophosphamide; HR = hormone receptor; LPBC = lymphocyte-predominant breast cancer; nP = nab-paclitaxel; pCR = pathological complete response; TNBC = triple-negative breast cancer; wk = weekly; d1,8 q3 wk = days 1 and 8 every-3-weeks

\* stratified test, primary analysis (stratified by 3 factors); \*\*stratified test, primary analysis (stratified by 4 factors including denosumab arm)

# primary endpoint significant to the 0.1 level; significance level for all further analyses is set to a two-sided  $\alpha = 0.05$

**eTable 5: Adherence to treatment**

|                                         | <b>Dmab<br/>N=377<br/>N(%)</b> | <b>no Dmab<br/>N=391<br/>N(%)</b> | <b>p-value<br/>Dmab</b> | <b>nP wk<br/>N=395<br/>N(%)</b> | <b>nP d1,8 q3 wk<br/>N=373<br/>N(%)</b> | <b>p-value<br/>nP</b> | <b>Overall<br/>N=768<br/>N(%)</b> |
|-----------------------------------------|--------------------------------|-----------------------------------|-------------------------|---------------------------------|-----------------------------------------|-----------------------|-----------------------------------|
| <b>Discontinued nP treatment</b>        | <b>56 (14.9)</b>               | <b>48 (12.3)</b>                  | <b>0.34</b>             | <b>81 (20.5)</b>                | <b>23 (6.2)</b>                         | <b>&lt;0.001</b>      | <b>104 (13.5)</b>                 |
| local progress                          | 5 (1.3)                        | 4 (1.0)                           |                         | 1 (0.3)                         | 8 (2.1)                                 |                       | 9 (1.2)                           |
| distant metastases/secondary malignancy | 1 (0.3)                        | 1 (0.3)                           |                         | 1 (0.3)                         | 1 (0.3)                                 |                       | 2 (0.3)                           |
| patient's death                         | 1 (0.3)                        | 0 (0.0)                           |                         | 0 (0.0)                         | 1 (0.3)                                 |                       | 1 (0.1)                           |
| AE                                      | 42 (11.1)                      | 40 (10.2)                         |                         | 69 (17.5)                       | 13 (3.5)                                |                       | 82 (10.7)                         |
| hematological toxicity                  | 8 (2.1)                        | 8 (2.0)                           |                         | 10 (2.5)                        | 6 (1.6)                                 |                       | 16 (2.1)                          |
| cardiac toxicity                        | 0 (0.0)                        | 0 (0.0)                           |                         | 0 (0.0)                         | 0 (0.0)                                 |                       | 0 (0.0)                           |
| other non-hematological toxicity        | 32 (8.5)                       | 28 (7.2)                          |                         | 55 (13.9)                       | 5 (1.3)                                 |                       | 60 (7.8)                          |
| AE not related to study medication      | 2 (0.5)                        | 4 (1.0)                           |                         | 4 (1.0)                         | 2 (0.5)                                 |                       | 6 (0.8)                           |
| patient's decision                      | 2 (0.5)                        | 1 (0.3)                           |                         | 3 (0.8)                         | 0 (0.0)                                 |                       | 3 (0.4)                           |
| investigator's decision                 | 5 (1.3)                        | 2 (0.5)                           |                         | 7 (1.8)                         | 0 (0.0)                                 |                       | 7 (0.9)                           |
| Started EC                              | 348                            | 373                               |                         | 365                             | 376                                     |                       | 721                               |
| <b>Discontinued EC</b>                  | <b>24 (6.9)</b>                | <b>25 (6.7)</b>                   | <b>1.00</b>             | <b>28 (7.7)</b>                 | <b>21 (5.9)</b>                         | <b>0.38</b>           | <b>49 (6.8)</b>                   |
| local progress                          | 2 (0.6)                        | 1 (0.3)                           |                         | 0 (0.0)                         | 3 (0.8)                                 |                       | 3 (0.4)                           |
| distant metastases/secondary malignancy | 0 (0.0)                        | 0 (0.0)                           |                         | 0 (0.0)                         | 0 (0.0)                                 |                       | 0 (0.0)                           |
| patient's death                         | 0 (0.0)                        | 0 (0.0)                           |                         | 0 (0.0)                         | 0 (0.0)                                 |                       | 0 (0.0)                           |
| AE                                      | 14 (4.0)                       | 13 (3.5)                          |                         | 22 (6.0)                        | 5 (1.4)                                 |                       | 27 (3.7)                          |
| hematological toxicity                  | 5 (1.4)                        | 5 (1.3)                           |                         | 10 (2.7)                        | 0 (0.0)                                 |                       | 10 (1.4)                          |
| cardiac toxicity                        | 1 (0.3)                        | 1 (0.3)                           |                         | 1 (0.3)                         | 1 (0.3)                                 |                       | 2 (0.3)                           |
| other non-hematological toxicity        | 7 (2.0)                        | 7 (1.9)                           |                         | 11 (3.0)                        | 3 (0.8)                                 |                       | 14 (1.9)                          |
| AE not related to study medication      | 1 (0.3)                        | 0 (0.0)                           |                         | 0 (0.0)                         | 1 (0.3)                                 |                       | 1 (0.1)                           |
| patient's decision                      | 5 (1.4)                        | 8 (2.1)                           |                         | 3 (0.8)                         | 10 (2.8)                                |                       | 13 (1.8)                          |
| investigator's decision                 | 3 (0.9)                        | 3 (0.8)                           |                         | 3 (0.8)                         | 3 (0.8)                                 |                       | 6 (0.8)                           |

|                                      |                                           |                   |                   |             |                   |                   |                  |                   |
|--------------------------------------|-------------------------------------------|-------------------|-------------------|-------------|-------------------|-------------------|------------------|-------------------|
| <b>nP dose delay, any reason</b>     |                                           | <b>253 (67.1)</b> | <b>257 (65.7)</b> | <b>0.70</b> | <b>301 (76.2)</b> | <b>209 (56.0)</b> | <b>&lt;0.001</b> | <b>510 (66.4)</b> |
|                                      | due to organizational reason*             | 169 (44.8)        | 172 (44.0)        | 0.83        | 207 (52.4)        | 134 (35.9)        | <0.001           | 341 (44.4)        |
|                                      | due to hematological toxicity             | 87 (23.1)         | 85 (21.7)         | 0.67        | 104 (26.3)        | 68 (18.2)         | 0.007            | 172 (22.4)        |
|                                      | due to cardiac toxicity                   | 1 (0.3)           | 3 (0.8)           | 0.62        | 3 (0.8)           | 1 (0.3)           | 0.63             | 4 (0.5)           |
|                                      | due to other non-hematological toxicity   | 51 (13.5)         | 43 (11.0)         | 0.32        | 70 (17.7)         | 24 (6.4)          | <0.001           | 94 (12.2)         |
|                                      | due to AE not related to study medication | 40 (10.6)         | 23 (5.9)          | 0.02        | 45 (11.4)         | 18 (4.8)          | <0.001           | 63 (8.2)          |
|                                      | due to other reason                       | 27 (7.2)          | 28 (7.2)          | 1.00        | 31 (7.8)          | 24 (6.4)          | 0.49             | 55 (7.2)          |
|                                      | due to unknown reason                     | 2 (0.5)           | 0 (0.0)           | 0.24        | 0 (0.0)           | 2 (0.5)           | 0.24             | 2 (0.3)           |
| <b>EC dose delay, any reason</b>     |                                           | <b>192 (55.2)</b> | <b>222 (59.5)</b> | <b>0.26</b> | <b>213 (58.4)</b> | <b>201 (56.5)</b> | <b>0.65</b>      | <b>414 (57.4)</b> |
|                                      | due to organizational reason*             | 74 (21.3)         | 97 (26.0)         | 0.14        | 77 (21.1)         | 94 (26.4)         | 0.10             | 171 (23.7)        |
|                                      | due to hematological toxicity             | 66 (19.0)         | 63 (16.9)         | 0.50        | 69 (18.9)         | 60 (16.9)         | 0.50             | 129 (17.9)        |
|                                      | due to cardiac toxicity                   | 2 (0.6)           | 1 (0.3)           | 0.61        | 2 (0.5)           | 1 (0.3)           | 1.00             | 3 (0.4)           |
|                                      | due to other non-hematological toxicity   | 38 (10.9)         | 43 (11.5)         | 0.81        | 46 (12.6)         | 35 (9.8)          | 0.29             | 81 (11.2)         |
|                                      | due to AE not related to study medication | 24 (6.9)          | 32 (8.6)          | 0.41        | 35 (9.6)          | 21 (5.9)          | 0.07             | 56 (7.8)          |
|                                      | due to other reason                       | 52 (14.9)         | 37 (9.9)          | 0.04        | 40 (11.0)         | 49 (13.8)         | 0.26             | 89 (12.3)         |
|                                      | due to unknown reason                     | 1 (0.3)           | 0 (0.0)           | 0.48        | 1 (0.3)           | 0 (0.0)           | 1.00             | 1 (0.1)           |
| <b>nP dose reduction, any reason</b> |                                           | <b>71 (18.8)</b>  | <b>75 (19.2)</b>  | <b>0.93</b> | <b>103 (26.1)</b> | <b>43 (11.5)</b>  | <b>&lt;0.001</b> | <b>146 (19.0)</b> |
|                                      | due to hematological toxicity             | 21 (5.6)          | 19 (4.9)          | 0.75        | 23 (5.8)          | 17 (4.6)          | 0.52             | 40 (5.2)          |
|                                      | due to cardiac toxicity                   | 1 (0.3)           | 0 (0.0)           | 0.49        | 1 (0.3)           | 0 (0.0)           | 1.00             | 1 (0.1)           |
|                                      | due to other non-hematological toxicity   | 48 (12.7)         | 57 (14.6)         | 0.46        | 79 (20.0)         | 26 (7.0)          | <0.001           | 105 (13.7)        |
|                                      | due to AE not related to study medication | 1 (0.3)           | 1 (0.3)           | 1.00        | 2 (0.5)           | 0 (0.0)           | 0.50             | 2 (0.3)           |
|                                      | due to other reason                       | 2 (0.5)           | 2 (0.5)           | 1.00        | 4 (1.0)           | 0 (0.0)           | 0.13             | 4 (0.5)           |
|                                      | due to unknown reason                     | 1 (0.3)           | 1 (0.3)           | 1.00        | 2 (0.5)           | 0 (0.0)           | 0.50             | 2 (0.3)           |
| <b>EC dose reduction, any reason</b> |                                           | <b>69 (19.8)</b>  | <b>73 (19.6)</b>  | <b>1.00</b> | <b>86 (23.6)</b>  | <b>56 (15.7)</b>  | <b>0.009</b>     | <b>142 (19.7)</b> |
|                                      | due to hematological toxicity             | 28 (40.6)         | 44 (60.3)         | 0.03        | 42 (48.8)         | 30 (53.6)         | 0.61             | 72 (50.7)         |
|                                      | due to cardiac toxicity                   | 0 (0.0)           | 0 (0.0)           | n.a.        | 0 (0.0)           | 0 (0.0)           | n.a.             | 0 (0.0)           |

|  |                                           |           |           |      |           |           |      |           |
|--|-------------------------------------------|-----------|-----------|------|-----------|-----------|------|-----------|
|  | due to other non-hematological toxicity   | 39 (56.5) | 30 (41.1) | 0.09 | 45 (52.3) | 24 (42.9) | 0.31 | 69 (48.6) |
|  | due to AE not related to study medication | 4 (5.8)   | 2 (2.7)   | 0.43 | 4 (4.7)   | 2 (3.6)   | 1.00 | 6 (4.2)   |
|  | due to other reason                       | 3 (4.3)   | 2 (2.7)   | 0.67 | 2 (2.3)   | 3 (5.4)   | 0.38 | 5 (3.5)   |
|  | due to unknown reason                     | 1 (1.4)   | 1 (1.4)   | 1.00 | 1 (1.2)   | 1 (1.8)   | 1.00 | 2 (1.4)   |

\*up to 3 days

AE = adverse event; Dmab = denosumab; nP = nab-paclitaxel; EC = epirubicin, cyclophosphamide; wk = weekly; d1,8 q3 wk = days 1 and 8 every-3-weeks

**eTable 6: Hematological and non-hematological adverse events**

| Predefined AEs             | Grade | with Dmab<br>nP wk<br><br>N=195<br>N(%) | with Dmab<br>nP d1,8 q3 wk<br>with Dmab<br>N=182<br>N(%) | without<br>Dmab nP wk<br><br>N=200<br>N(%) | without<br>Dmab nP<br>d1,8 q3 wk<br><br>N=191<br>N(%) | p-value <sup>+</sup> | p-value <sup>++</sup> |
|----------------------------|-------|-----------------------------------------|----------------------------------------------------------|--------------------------------------------|-------------------------------------------------------|----------------------|-----------------------|
| Anemia                     | any   | 185 (94.9)                              | 172 (94.5)                                               | 197 (98.5)                                 | 182 (95.3)                                            | 0.15                 | 0.28                  |
|                            | 3-4   | 18 (9.2)                                | 5 (2.7)                                                  | 16 (8.0)                                   | 20 (10.5)                                             | 0.14                 | 0.35                  |
| Leukopenia                 | any   | 185 (94.9)                              | 170 (93.4)                                               | 195 (97.5)                                 | 181 (94.8)                                            | 0.24                 | 0.18                  |
|                            | 3-4   | 98 (50.3)                               | 83 (45.6)                                                | 110 (55.0)                                 | 96 (50.3)                                             | 0.22                 | 0.22                  |
| Neutropenia                | any   | 178 (91.3)                              | 161 (88.5)                                               | 183 (91.5)                                 | 171 (89.5)                                            | 0.81                 | 0.28                  |
|                            | 3-4   | 122 (62.6)                              | 107 (58.8)                                               | 130 (65.0)                                 | 123 (64.4)                                            | 0.26                 | 0.55                  |
| Febrile neutropenia        | any   | 9 (4.6)                                 | 8 (4.4)                                                  | 17 (8.5)                                   | 15 (7.9)                                              | 0.04                 | 0.88                  |
| Thrombocytopenia           | any   | 99 (50.8)                               | 98 (53.8)                                                | 101 (50.5)                                 | 109 (57.1)                                            | 0.72                 | 0.19                  |
|                            | 3-4   | 15 (7.7)                                | 8 (4.4)                                                  | 19 (9.5)                                   | 20 (10.5)                                             | 0.06                 | 0.60                  |
| Blood bilirubin increased  | any   | 6 (3.1)                                 | 6 (3.3)                                                  | 16 (8.0)                                   | 3 (1.6)                                               | 0.27                 | 0.03                  |
|                            | 3-4   | 1 (0.5)                                 | 0 (0.0)                                                  | 0 (0.0)                                    | 0 (0.0)                                               | 0.49                 | 1.00                  |
| Blood AP increased         | any   | 65 (33.3)                               | 59 (32.4)                                                | 76 (38.0)                                  | 68 (35.6)                                             | 0.26                 | 0.65                  |
|                            | 3-4   | 1 (0.5)                                 | 0 (0.0)                                                  | 0 (0.0)                                    | 0 (0.0)                                               | 0.49                 | 1.00                  |
| ASAT increased             | any   | 86 (44.1)                               | 72 (39.6)                                                | 83 (41.5)                                  | 68 (35.6)                                             | 0.38                 | 0.14                  |
|                            | 3-4   | 3 (1.5)                                 | 0 (0.0)                                                  | 6 (3.0)                                    | 3 (1.6)                                               | 0.14                 | 0.15                  |
| ALAT increased             | any   | 133 (68.2)                              | 101 (55.5)                                               | 123 (61.5)                                 | 110 (57.6)                                            | 0.51                 | 0.02                  |
|                            | 3-4   | 10 (5.1)                                | 4 (2.2)                                                  | 9 (4.5)                                    | 7 (3.7)                                               | 0.85                 | 0.20                  |
| Blood creatinine increased | any   | 23 (11.8)                               | 17 (9.3)                                                 | 22 (11.0)                                  | 32 (16.8)                                             | 0.19                 | 0.51                  |
|                            | 3-4   | 0 (0.0)                                 | 0 (0.0)                                                  | 0 (0.0)                                    | 0 (0.0)                                               | n.a.                 | n.a.                  |
| Fatigue                    | any   | 146 (74.9)                              | 124 (68.1)                                               | 146 (73.0)                                 | 127 (66.5)                                            | 0.63                 | 0.05                  |
|                            | 3-4   | 11 (5.6)                                | 9 (4.9)                                                  | 9 (4.5)                                    | 7 (3.7)                                               | 0.50                 | 0.73                  |
| Headache                   | any   | 40 (20.5)                               | 36 (19.8)                                                | 45 (22.5)                                  | 35 (18.3)                                             | 0.93                 | 0.42                  |
|                            | 3-4   | 0 (0.0)                                 | 0 (0.0)                                                  | 1 (0.5)                                    | 0 (0.0)                                               | 1.00                 | 1.00                  |
| Nausea                     | any   | 109 (55.9)                              | 116 (63.7)                                               | 113 (56.5)                                 | 125 (65.4)                                            | 0.77                 | 0.02                  |

|                                               |     |            |            |            |            |      |       |
|-----------------------------------------------|-----|------------|------------|------------|------------|------|-------|
|                                               | 3-4 | 2 (1.0)    | 3 (1.6)    | 6 (3.0)    | 4 (2.1)    | 0.30 | 1.00  |
| Decreased appetite                            | any | 26 (13.3)  | 22 (12.1)  | 35 (17.5)  | 16 (8.4)   | 0.92 | 0.03  |
|                                               | 3-4 | 0 (0.0)    | 2 (1.1)    | 2 (1.0)    | 1 (0.5)    | 1.00 | 0.68  |
| Vomiting                                      | any | 27 (13.8)  | 31 (17.0)  | 30 (15.0)  | 21 (11.0)  | 0.41 | 0.92  |
|                                               | 3-4 | 1 (0.5)    | 0 (0.0)    | 1 (0.5)    | 1 (0.5)    | 1.00 | 1.00  |
| Diarrhea                                      | any | 83 (42.6)  | 57 (31.3)  | 81 (40.5)  | 67 (35.1)  | 0.88 | 0.02  |
|                                               | 3-4 | 5 (2.6)    | 0 (0.0)    | 5 (2.5)    | 5 (2.6)    | 0.30 | 0.30  |
| Hypertension                                  | any | 14 (7.2)   | 12 (6.6)   | 12 (6.0)   | 18 (9.4)   | 0.78 | 0.49  |
|                                               | 3-4 | 2 (1.0)    | 2 (1.1)    | 1 (0.5)    | 0 (0.0)    | 0.21 | 1.00  |
| Peripheral sensory neuropathy                 | any | 142 (72.8) | 84 (46.2)  | 154 (77.0) | 91 (47.6)  | 0.46 | <.001 |
|                                               | 3-4 | 12 (6.2)   | 2 (1.1)    | 9 (4.5)    | 2 (1.0)    | 0.55 | <.001 |
| Arthralgia                                    | any | 53 (27.2)  | 41 (22.5)  | 47 (23.5)  | 30 (15.7)  | 0.08 | 0.04  |
|                                               | 3-4 | 0 (0.0)    | 0 (0.0)    | 2 (1.0)    | 0 (0.0)    | 0.50 | 0.50  |
| Myalgia                                       | any | 34 (17.4)  | 29 (15.9)  | 22 (11.0)  | 21 (11.0)  | 0.03 | 0.83  |
|                                               | 3-4 | 1 (0.5)    | 0 (0.0)    | 2 (1.0)    | 0 (0.0)    | 1.00 | 0.25  |
| Epistaxis                                     | any | 53 (27.2)  | 27 (14.8)  | 53 (26.5)  | 25 (13.1)  | 0.72 | <.001 |
|                                               | 3-4 | 0 (0.0)    | 0 (0.0)    | 0 (0.0)    | 0 (0.0)    | n.a. | n.a.  |
| Dyspnea                                       | any | 29 (14.9)  | 21 (11.5)  | 25 (12.5)  | 21 (11.0)  | 0.59 | 0.33  |
|                                               | 3-4 | 3 (1.5)    | 1 (0.5)    | 1 (0.5)    | 0 (0.0)    | 0.21 | 0.37  |
| Alopecia                                      | any | 169 (86.7) | 158 (86.8) | 176 (88.0) | 161 (84.3) | 0.83 | 0.53  |
| Palmar-plantar erythrodysesthesia syndrome    | any | 16 (8.2)   | 8 (4.4)    | 18 (9.0)   | 5 (2.6)    | 0.88 | 0.004 |
|                                               | 3-4 | 1 (0.5)    | 0 (0.0)    | 1 (0.5)    | 0 (0.0)    | 1.00 | 0.50  |
| Embolicism                                    | any | 7 (3.6)    | 7 (3.8)    | 7 (3.5)    | 8 (4.2)    | 1.00 | 0.85  |
|                                               | 3-4 | 0 (0.0)    | 3 (1.6)    | 3 (1.5)    | 1 (0.5)    | 1.00 | 0.72  |
| Pyrexia                                       | any | 47 (24.1)  | 19 (10.4)  | 29 (14.5)  | 25 (13.1)  | 0.17 | 0.005 |
|                                               | 3-4 | 6 (3.1)    | 1 (0.5)    | 2 (1.0)    | 3 (1.6)    | 0.57 | 0.39  |
| ≥10% decrease in LVEF from baseline and < 50% | any | 0 (0.0)    | 2 (1.1)    | 1 (0.5)    | 0 (0.0)    | 0.62 | 0.61  |
| Osteonecrosis of jaw*                         | any | 0 (0.0)    | 1 (0.5)    | 0 (0.0)    | 0 (0.0)    | 0.49 | 0.49  |
|                                               | 3-4 | 0 (0.0)    | 1 (0.5)    | 0 (0.0)    | 0 (0.0)    | 0.49 | 0.49  |



|                                  |     |            |            |            |            |        |      |
|----------------------------------|-----|------------|------------|------------|------------|--------|------|
| Hypocalcaemia*§                  | any | 98 (50.3)  | 95 (52.2)  | 62 (31.0)  | 50 (26.2)  | <0.001 | 0.66 |
|                                  | 3-4 | 1 (0.5)    | 3 (1.6)    | 1 (0.5)    | 3 (1.6)    | 1.00   | 0.17 |
| Anaphylactic reaction****        | any | 2 (1.0)    | 1 (0.5)    | 0 (0.0)    | 0 (0.0)    | 0.12   | 1.00 |
| Cranial nerve disorder****       | any | 1 (0.5)    | 0 (0.0)    | 4 (2.0)    | 0 (0.0)    | 0.37   | 0.06 |
|                                  | 3-4 | 0 (0.0)    | 0 (0.0)    | 2 (1.0)    | 0 (0.0)    | 0.50   | 0.50 |
| Infusion related reaction**      | any | 6 (3.1)    | 4 (2.2)    | 4 (2.0)    | 3 (1.6)    | 0.47   | 0.63 |
|                                  | 3-4 | 0 (0.0)    | 2 (1.1)    | 1 (0.5)    | 0 (0.0)    | 0.62   | 0.61 |
| Hypersensitivity**               | any | 5 (2.6)    | 5 (2.7)    | 8 (4.0)    | 7 (3.7)    | 0.42   | 1.00 |
|                                  | 3-4 | 0 (0.0)    | 1 (0.5)    | 1 (0.5)    | 1 (0.5)    | 1.00   | 0.61 |
| Cardiac failure, NYHA**          | any | 0 (0.0)    | 0 (0.0)    | 1 (0.5)    | 0 (0.0)    | 1.00   | 1.00 |
|                                  | 3-4 | 0 (0.0)    | 0 (0.0)    | 0 (0.0)    | 0 (0.0)    | n.a.   | n.a. |
| Pneumonitis**                    | any | 3 (1.5)    | 0 (0.0)    | 0 (0.0)    | 0 (0.0)    | 0.12   | 0.25 |
|                                  | 3-4 | 1 (0.5)    | 0 (0.0)    | 0 (0.0)    | 0 (0.0)    | 0.49   | 1.00 |
| Cough                            | any | 25 (12.8)  | 14 (7.7)   | 25 (12.5)  | 21 (11.0)  | 0.57   | 0.17 |
|                                  | 3-4 | 1 (0.5)    | 0 (0.0)    | 1 (0.5)    | 0 (0.0)    | 1.00   | 0.50 |
| Other pulmonary toxicity**       | any | 2 (1.0)    | 0 (0.0)    | 3 (1.5)    | 5 (2.6)    | 0.11   | 1.00 |
|                                  | 3-4 | 0 (0.0)    | 0 (0.0)    | 0 (0.0)    | 0 (0.0)    | n.a.   | n.a. |
| Pneumonia**                      | any | 8 (4.1)    | 2 (1.1)    | 4 (2.0)    | 0 (0.0)    | 0.11   | 0.01 |
|                                  | 3-4 | 4 (2.1)    | 1 (0.5)    | 3 (1.5)    | 0 (0.0)    | 0.50   | 0.07 |
| Infection other than pneumonia** | any | 89 (45.6)  | 70 (38.5)  | 78 (39.0)  | 79 (41.4)  | 0.61   | 0.56 |
|                                  | 3-4 | 9 (4.6)    | 5 (2.7)    | 15 (7.5)   | 9 (4.7)    | 0.14   | 0.18 |
| Other AE***                      | any | 183 (93.8) | 163 (89.6) | 190 (95.0) | 172 (90.1) | 0.69   | 0.02 |
|                                  | 3-4 | 35 (17.9)  | 37 (20.3)  | 30 (15.0)  | 23 (12.0)  | 0.04   | 0.92 |

AE = Adverse event; AESI = Adverse event of special interest; ALAT = Alanine aminotransferase; AP = Alkaline phosphatase; ASAT = Aspartate aminotransferase; Dmab = denosumab; LVEF = Left ventricular ejection fraction; nP = nab-paclitaxel; NYHA = New York Heart Association; wk = weekly; d1,8 q3 wk = days 1 and 8 every-3-weeks

\*AE of special interest for denosumab; \*\*AE of special interest for HER2-positive patients treated with ABP 980; \*\*\*Reported as free-text; \*\*\*\*AE of special interest for nab-paclitaxel; § NOTE: One high grade hypocalcemia occurred before amendment 1 and was therefore not reported as AESI; + comparing with vs without Denosumab; ++ comparing nab-paclitaxel weekly vs nab-paclitaxel d1,8 q3w

**eFigure 1: Patient-reported outcomes Denosumab: FACT-Taxane total score**

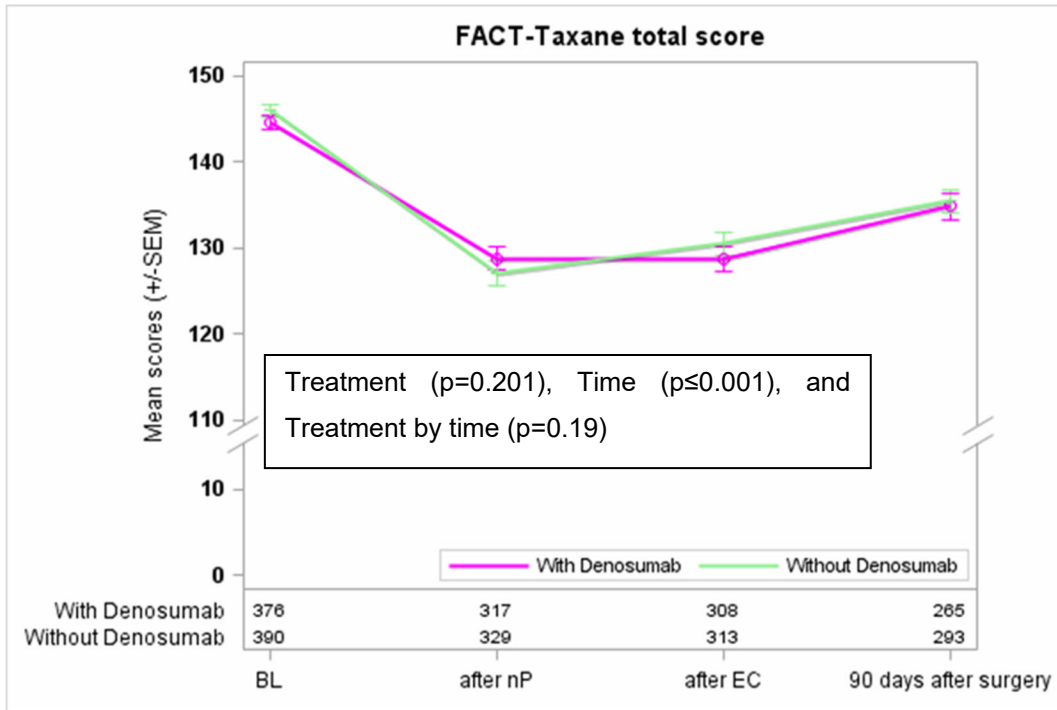

BL = baseline; EC = epirubicin, cyclophosphamide; FACT = Functional Assessment of Cancer Therapy; nP = nab-Paclitaxel; SEM = standard error of the mean

**eFigure 2: Patient-reported outcomes nab-Paclitaxel: Physical well-being (A), Functional well-being (B), Additional concerns (C), FACT-Taxane total score (D), FACT-G total score (E)**

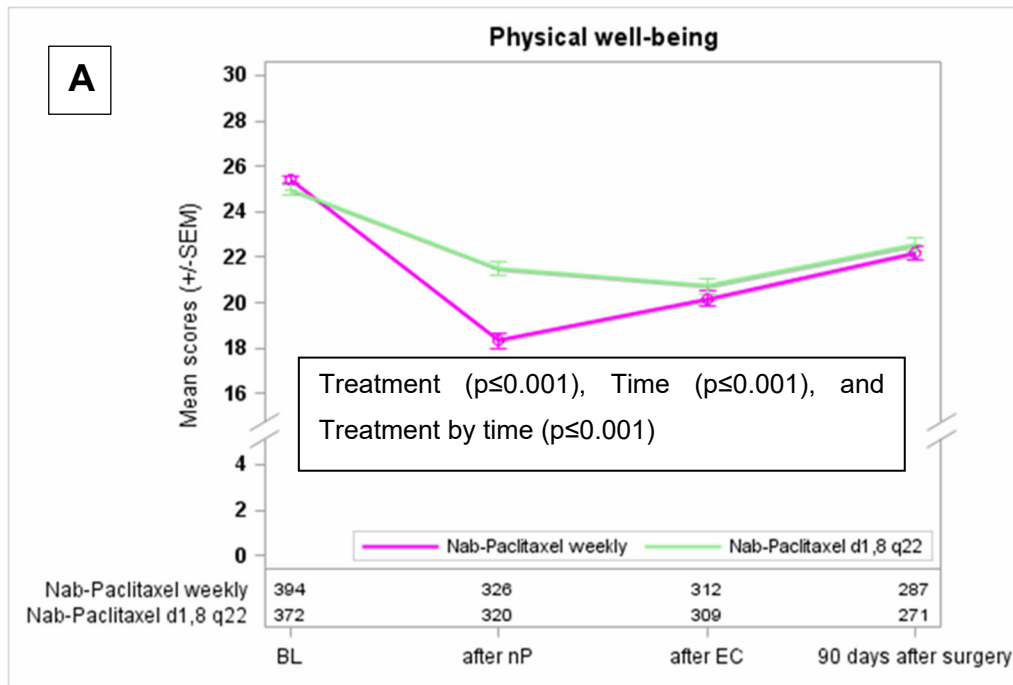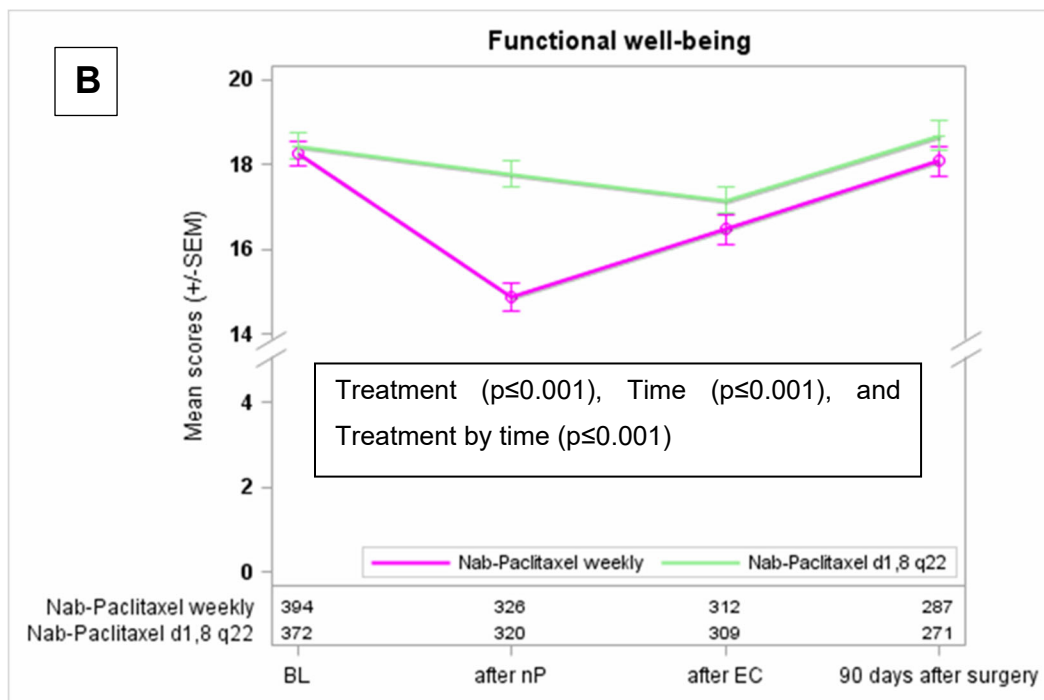

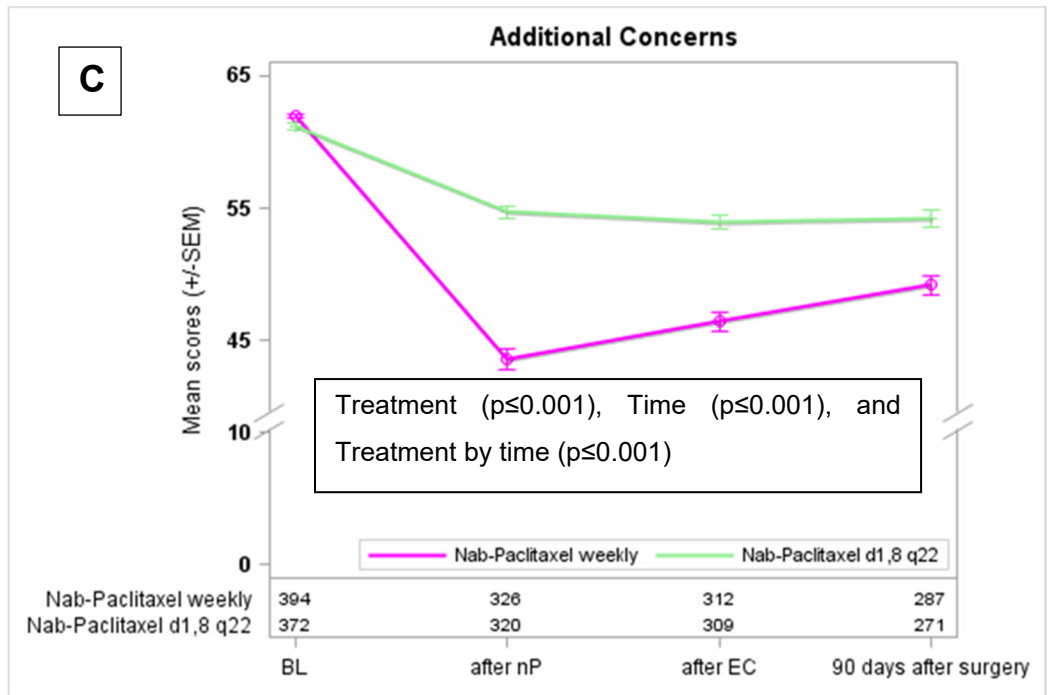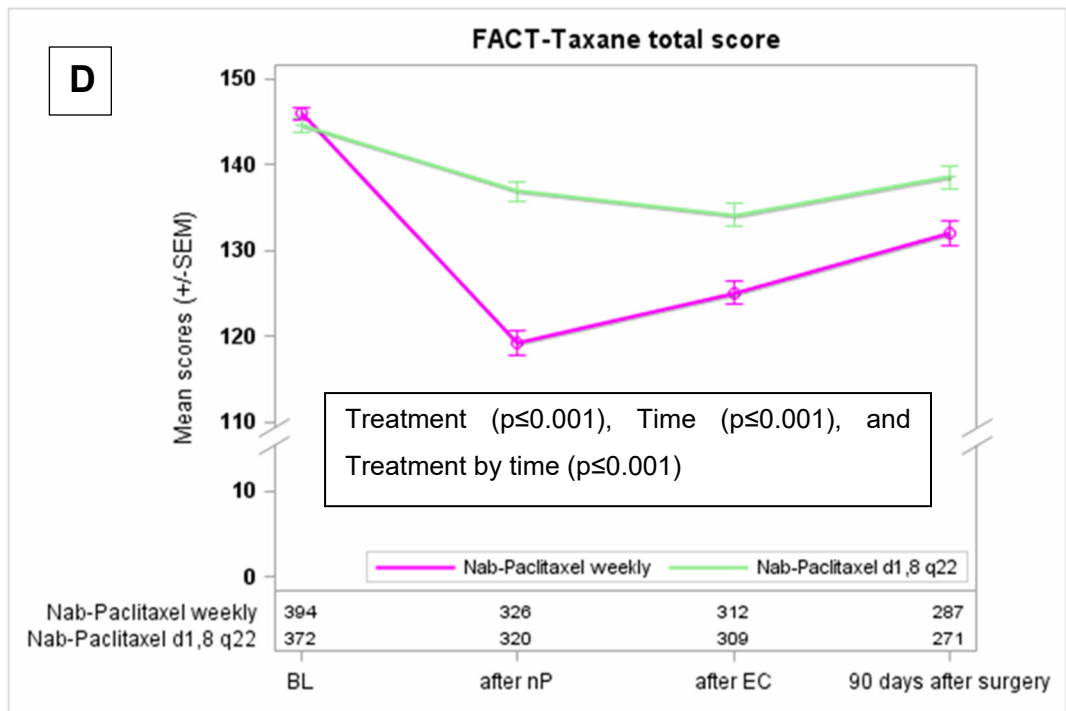

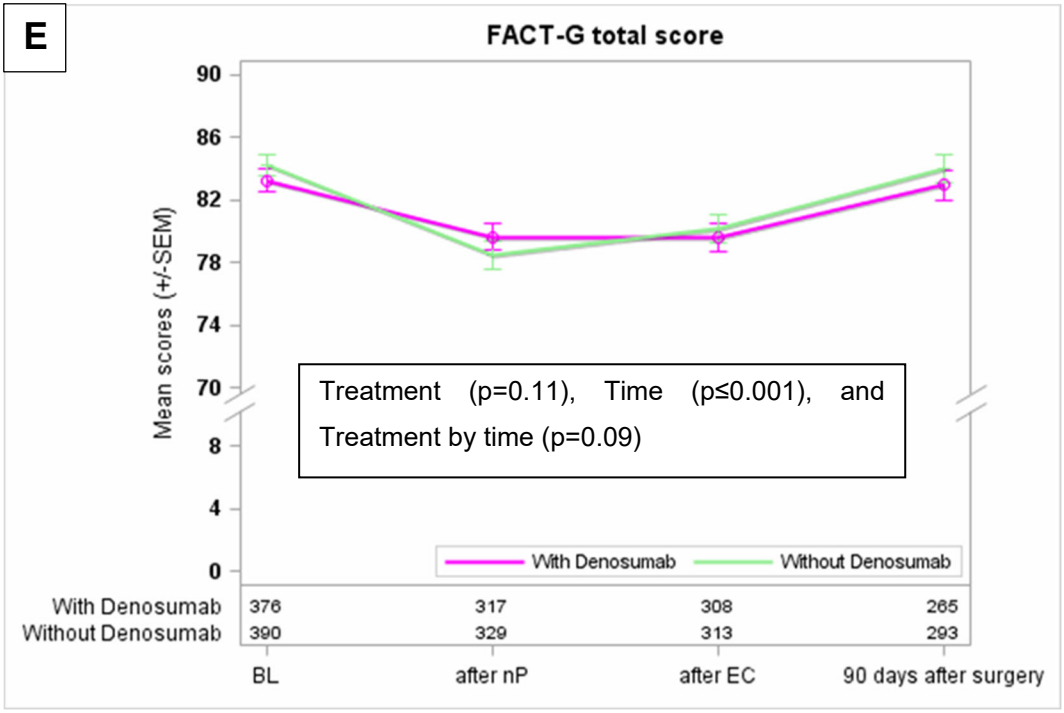

BL = baseline; EC = epirubicin, cyclophosphamide; FACT = Functional Assessment of Cancer Therapy; nP = nab-Paclitaxel; SEM = standard error of the mean
